# Supplementary material
Source: HighWire-hosted journal article supplement (https://www.jneurosci.org/content/42/8/1587)
Supplement: inline-supplementary-material-6 [file inline-supplementary-material-6.xlsx]

## Sheet: Sheet1
Figure 2-4: Associations of Disease-Linked Genes and Peritumor Astrocyte Genes
	Down in Peritumor (all genes)			Synapse genes (down in peritumor)			Receptor genes (down in peritumor)
	p	padj	odds ratio	p	padj	odds ratio	p	padj	odds ratio
Alzheimer Disease	8.51267e-09	4.82385e-08	2.09817	3.26951e-05	3.26951e-05	4.77198	0.25218	0.25218	1.78417
Anxiety Disorders	9.12425e-07	2.5852e-06	2.34202	1.13781e-11	1.99117e-11	13.4116	1.35004e-07	9.45026e-07	13.5244
Bipolar Disorder	2.59868e-14	4.41775e-13	2.36956	1.39868e-21	9.79073e-21	14.9816	8.93868e-07	1.66625e-06	7.49808
Depressive Disorder	9.04927e-06	2.19768e-05	1.97398	1.84755e-08	2.15547e-08	8.24192	0.0354845	0.0413985	3.46389
Mood Disorders	3.97461e-08	1.68921e-07	2.44168	1.57298e-15	3.9464e-15	16.3028	3.82082e-07	1.33729e-06	11.8949
Obsessive-Compulsive Disorder	4.92032e-07	1.67291e-06	2.45709	4.96554e-11	6.95175e-11	13.4012	9.52144e-07	1.66625e-06	12.676
Schizophrenia	5.47467e-12	4.65347e-11	1.87581	1.69132e-15	3.9464e-15	8.31704	5.12567e-06	7.17594e-06	5.23601
Amyotrophic Lateral Sclerosis	0.29615	0.501143	1.25037
Autistic Disorder	1	1	0.804903
Autoimmune Diseases	1	1	0.985426
Epilepsy	0.0536324	0.101306	1.39409
Frontotemporal Dementia	0.590321	0.771958	1.19219
Huntington Disease	0.734149	0.891467	1.24518
Multiple Sclerosis	0.0339696	0.0721854	1.30178
Neurodegenerative Diseases	0.472856	0.66988	1.16625
Parkinson Disease	0.324269	0.501143	1.26908
Tauopathies	1	1	0.569988
